# Supplementary material
Source: publisher site journal article supplement (https://www.spandidos-publications.com/399/downloadSupplementary)
Supplement: Supplementary file 1 [file downloadSupplementary]

Figure S1. Treatment with JQ1 inhibits cell viability and proliferation of CSC1589 cells. (A) Cell viability of CSC1589 was detected by a Cell Counting Kit-8 assay. CSC1589 cells were treated with JQ1 for 24 and 48 h (error bars represent standard error of the mean). (B) Cell proliferation was assessed by cell growth counting assay. CSC1589 were treated with JQ1. After seeding cells into plates for 24 h, the relative the number of cells was counted for the next 3 days. (error bars represent standard error of the mean). (C) Macroscopic images and the electron microscopy images of colonies of CSC1589 cells. Scale bars=20  $\mu$ m. (D) Bar graph of the colony numbers of CSC1589 (error bars represent standard error of the mean). \* $P$ <0.05, \*\* $P$ <0.01 vs. control.

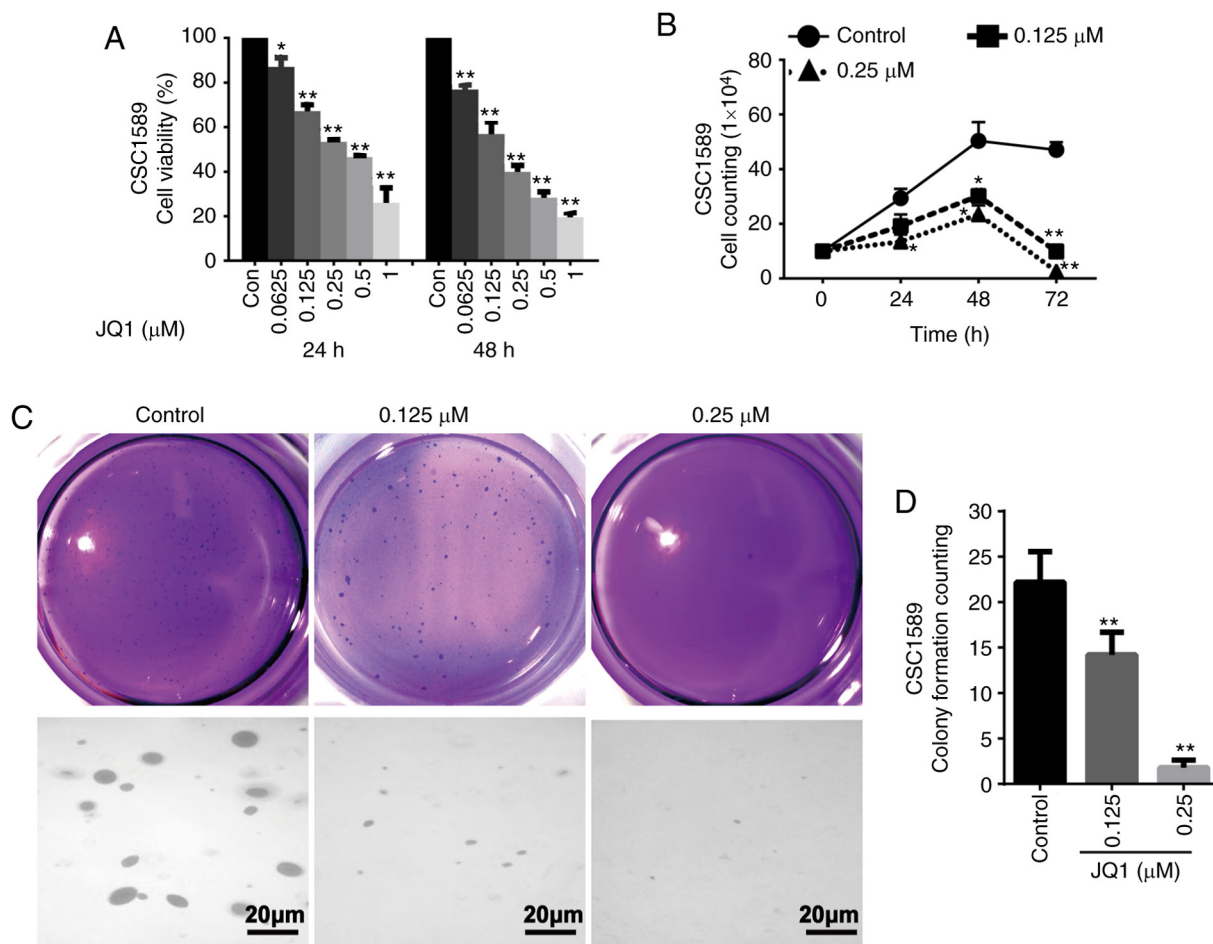

Figure S2. Treatment with JQ1 or siBrd4 reduced proliferation and self-renewal in CSC1589, CSC2078 and TS543 cells. (A) Macroscopic images of colonies of CSC2078 and TS543 cells treated with JQ1 or siBrd4. (B and C) Neural spheres formation of CSC1589 were measured in the presence of JQ1 at indicated concentrations (means  $\pm$  standard error of the mean of five fields). Scale bar=50  $\mu$ m. (D) Electron microscopy analysis of neural spheres of CSC2078 and TS543 cells treated with JQ1. Scale bar=50  $\mu$ m. (E) Electron microscopy analysis of neural spheres of CSC2078 cells treated with siBrd4 (Scale bar=100  $\mu$ m). \*\*P<0.01, vs. Con. Con, control; siBrd4, small interfering RNA against bromodomain-containing protein 4.

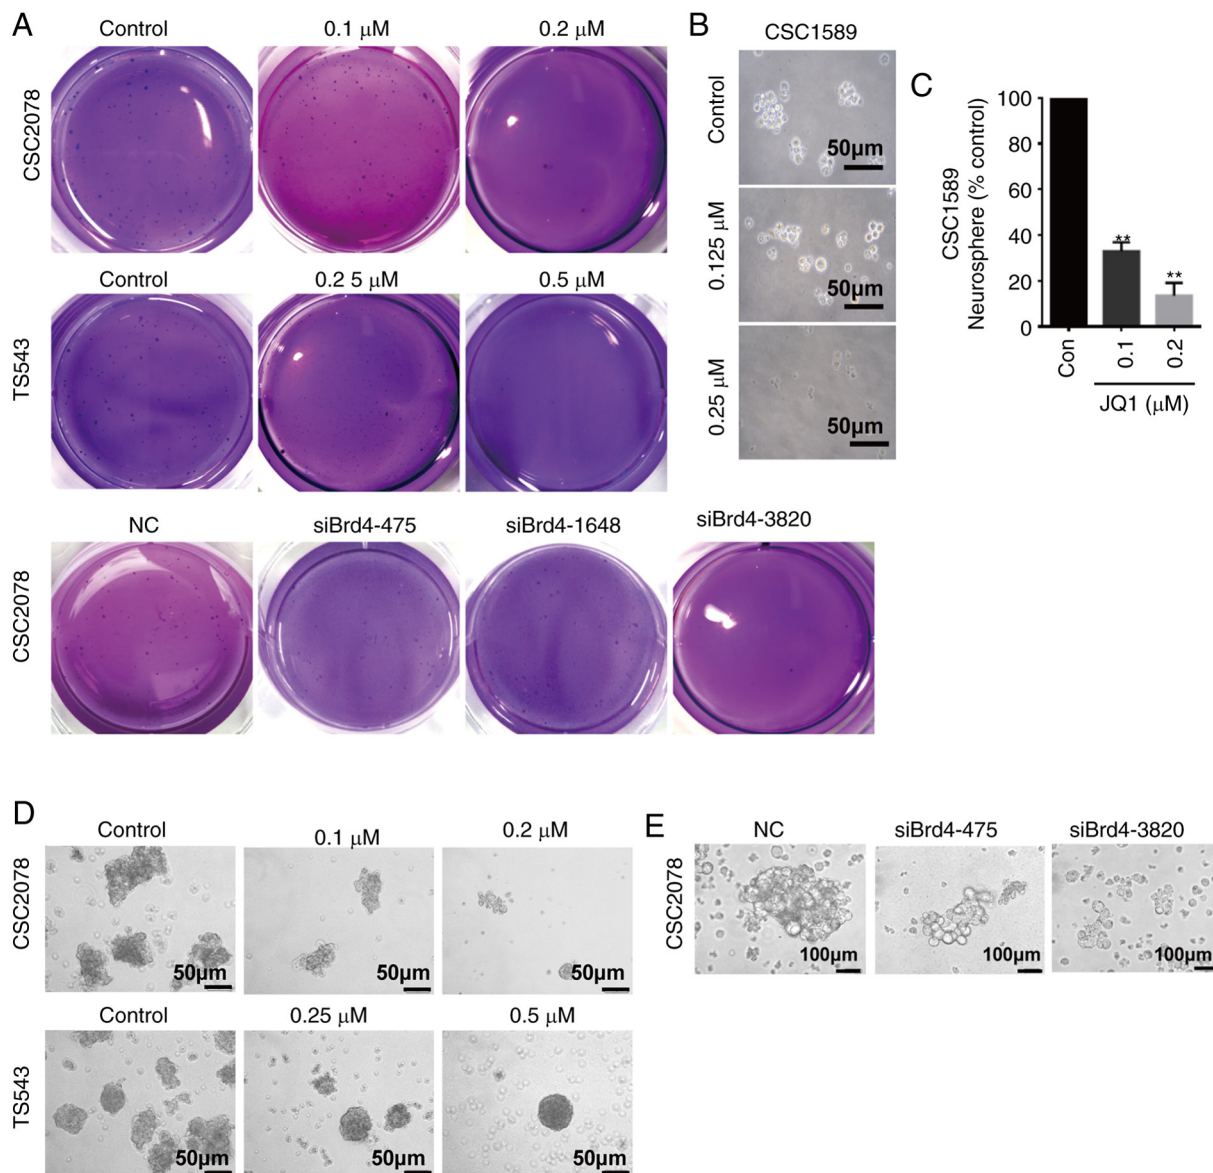

Figure S3. JQ1 or siBrd4 induces cell cycle arrest in glioma stem cells. CSC2078 and TS543 cells were treated with JQ1 for 24 h. CSC2078 cells were transfected with si-NC or siBrd4 for 48 h. Then subjected to flow cytometry analysis of cell cycle using PI staining. NC, negative control; PI, propidium iodide; siBrd4, small interfering RNA against bromodomain-containing protein 4.

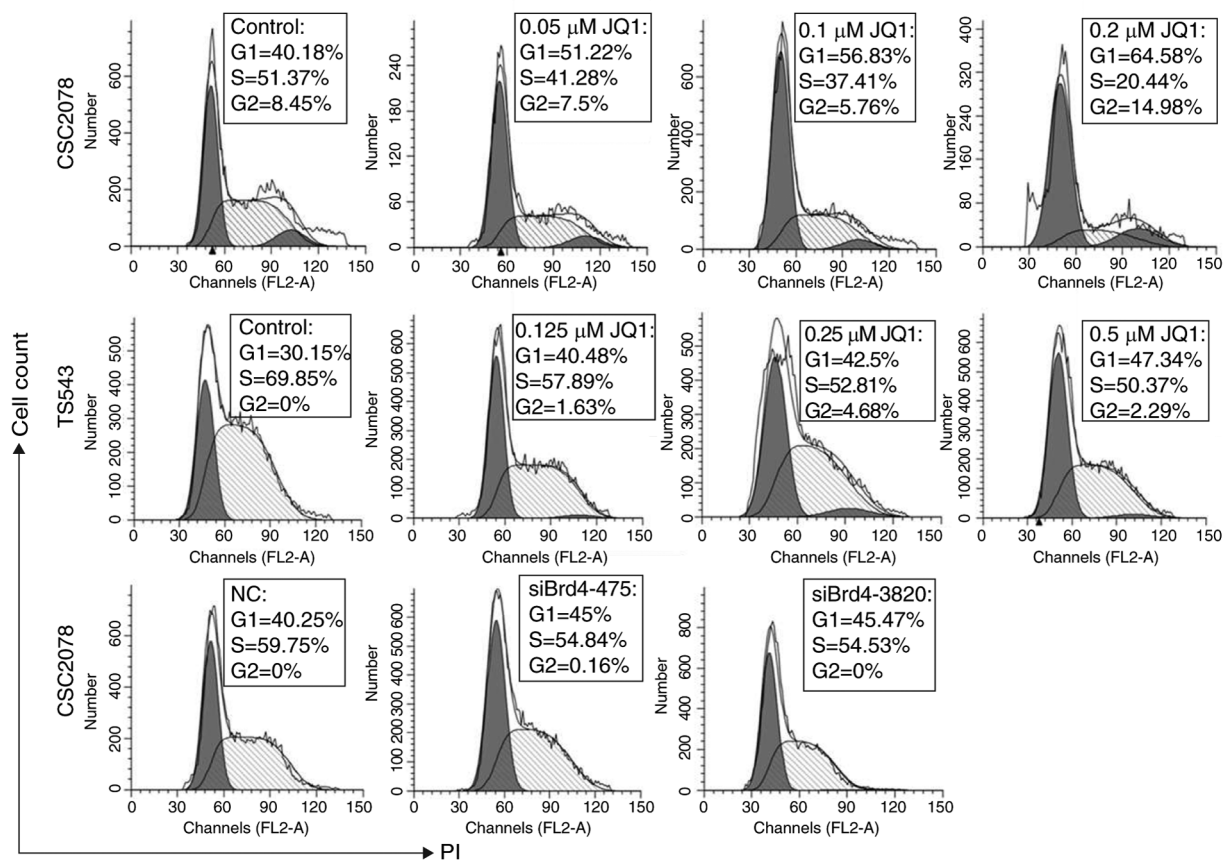

Figure S4. JQ1 or siBrd4 induces cell apoptosis in CSC2078 and TS543 cells. CSC2078 and TS543 cells were treated with JQ1 for 24 h. CSC2078 cells were transfected with si-NC or siBrd4 for 48 h. Cell apoptosis was evaluated in CSC2078 and TS543 by flow cytometry with double staining of Annexin V and PI. FITC, fluorescein isothiocyanate; PI, propidium iodide; siBrd4, small interfering RNA against bromodomain-containing protein 4.

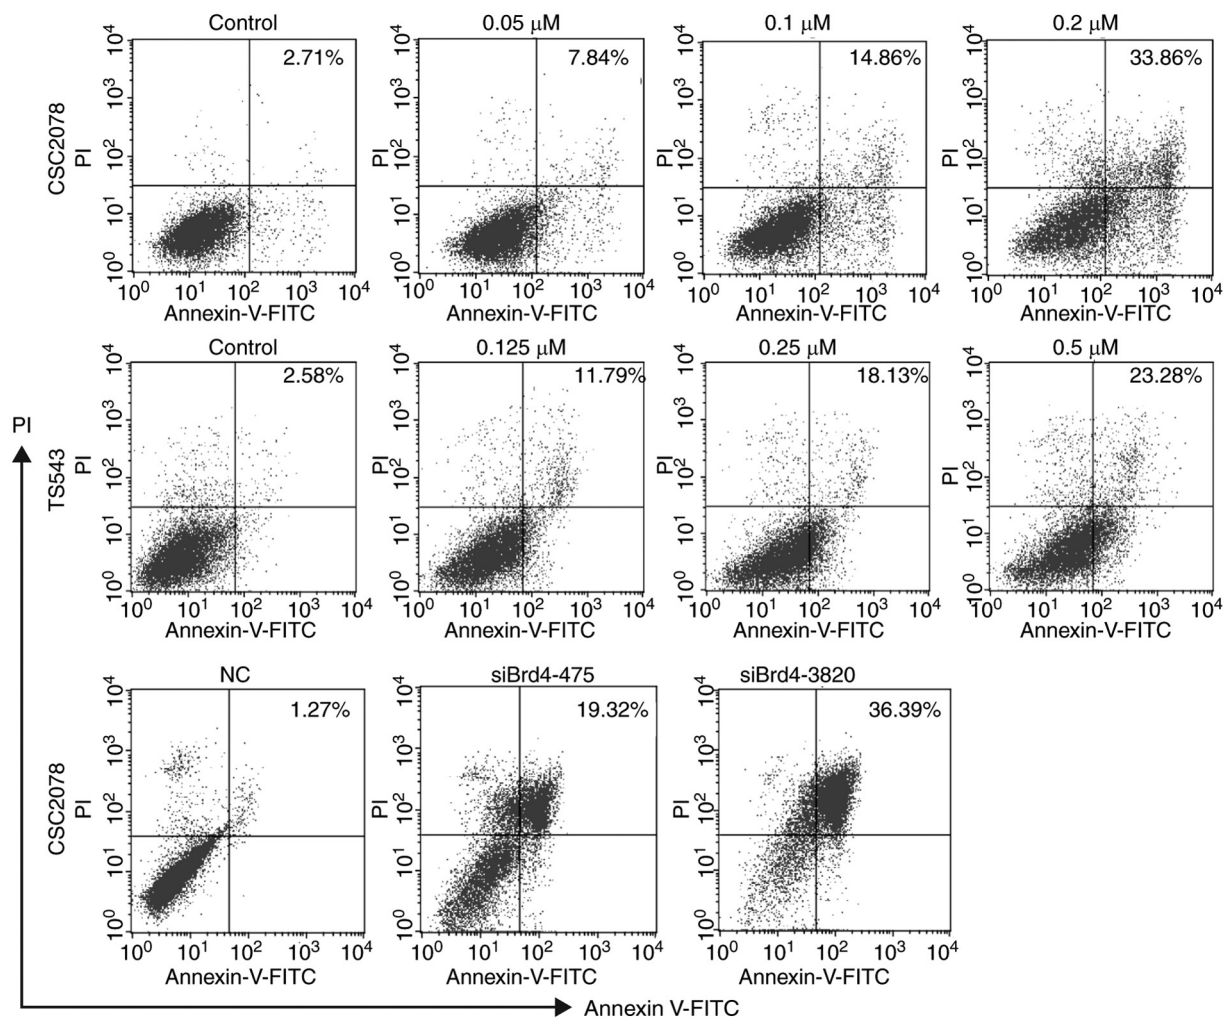

Figure S5. JQ1 induces cell apoptosis in CSC1589 and CSC2078 cells. (A) Hoechst33342 staining of CSC1589 cells validated the pro-apoptotic effect of different concentrations of JQ1. Scale bar=20  $\mu$ m. (B) Statistical analysis (error bars represent standard error of the mean). (C) The pro-apoptotic effect of JQ1 on CSC2078 was demonstrated via with Terminal deoxynucleotidyl-transferase-mediated dUTP nick end labeling staining. Scale bar=20  $\mu$ m. (D) Quantitative analysis of apoptotic index (error bars represent standard error of the mean). \*P<0.05, \*\*P<0.01 vs. Con. Con, control.

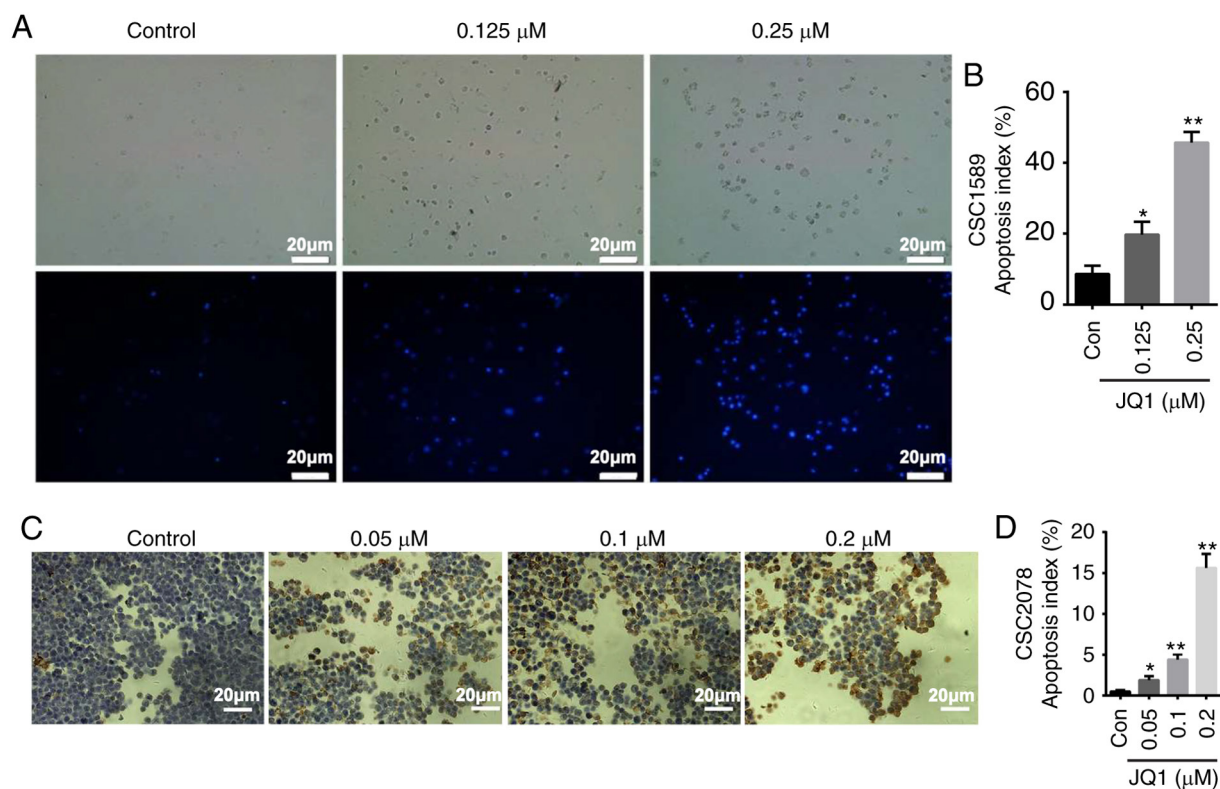

Figure S6. JQ1 has the potential to promote differentiation of glioma stem cells. (A) GO analysis of mRNAs according to biological process. (B) Fold change in nerve cell markers of CSC2078 was analyzed by RNA-Seq. (C and D) Immunofluorescent analysis of stem cell marker Nestin in CSC1589 cells treated with JQ1 for 48 h (scale bar=20  $\mu$ m). (E) Reverse transcription-quantitative polymerase chain reaction of Nestin expression in CSC2078 cells treated with JQ1 for 24 h (error bars represent standard error of the mean). \* $P$ <0.05, \*\* $P$ <0.01 vs. Con. Con, control; Cntf, ciliary neurotrophic factor; GO, Gene Ontology; PDGF $\alpha$ , platelet-derived growth factor  $\alpha$ ; Tuj1, class III  $\beta$ -tubulin.

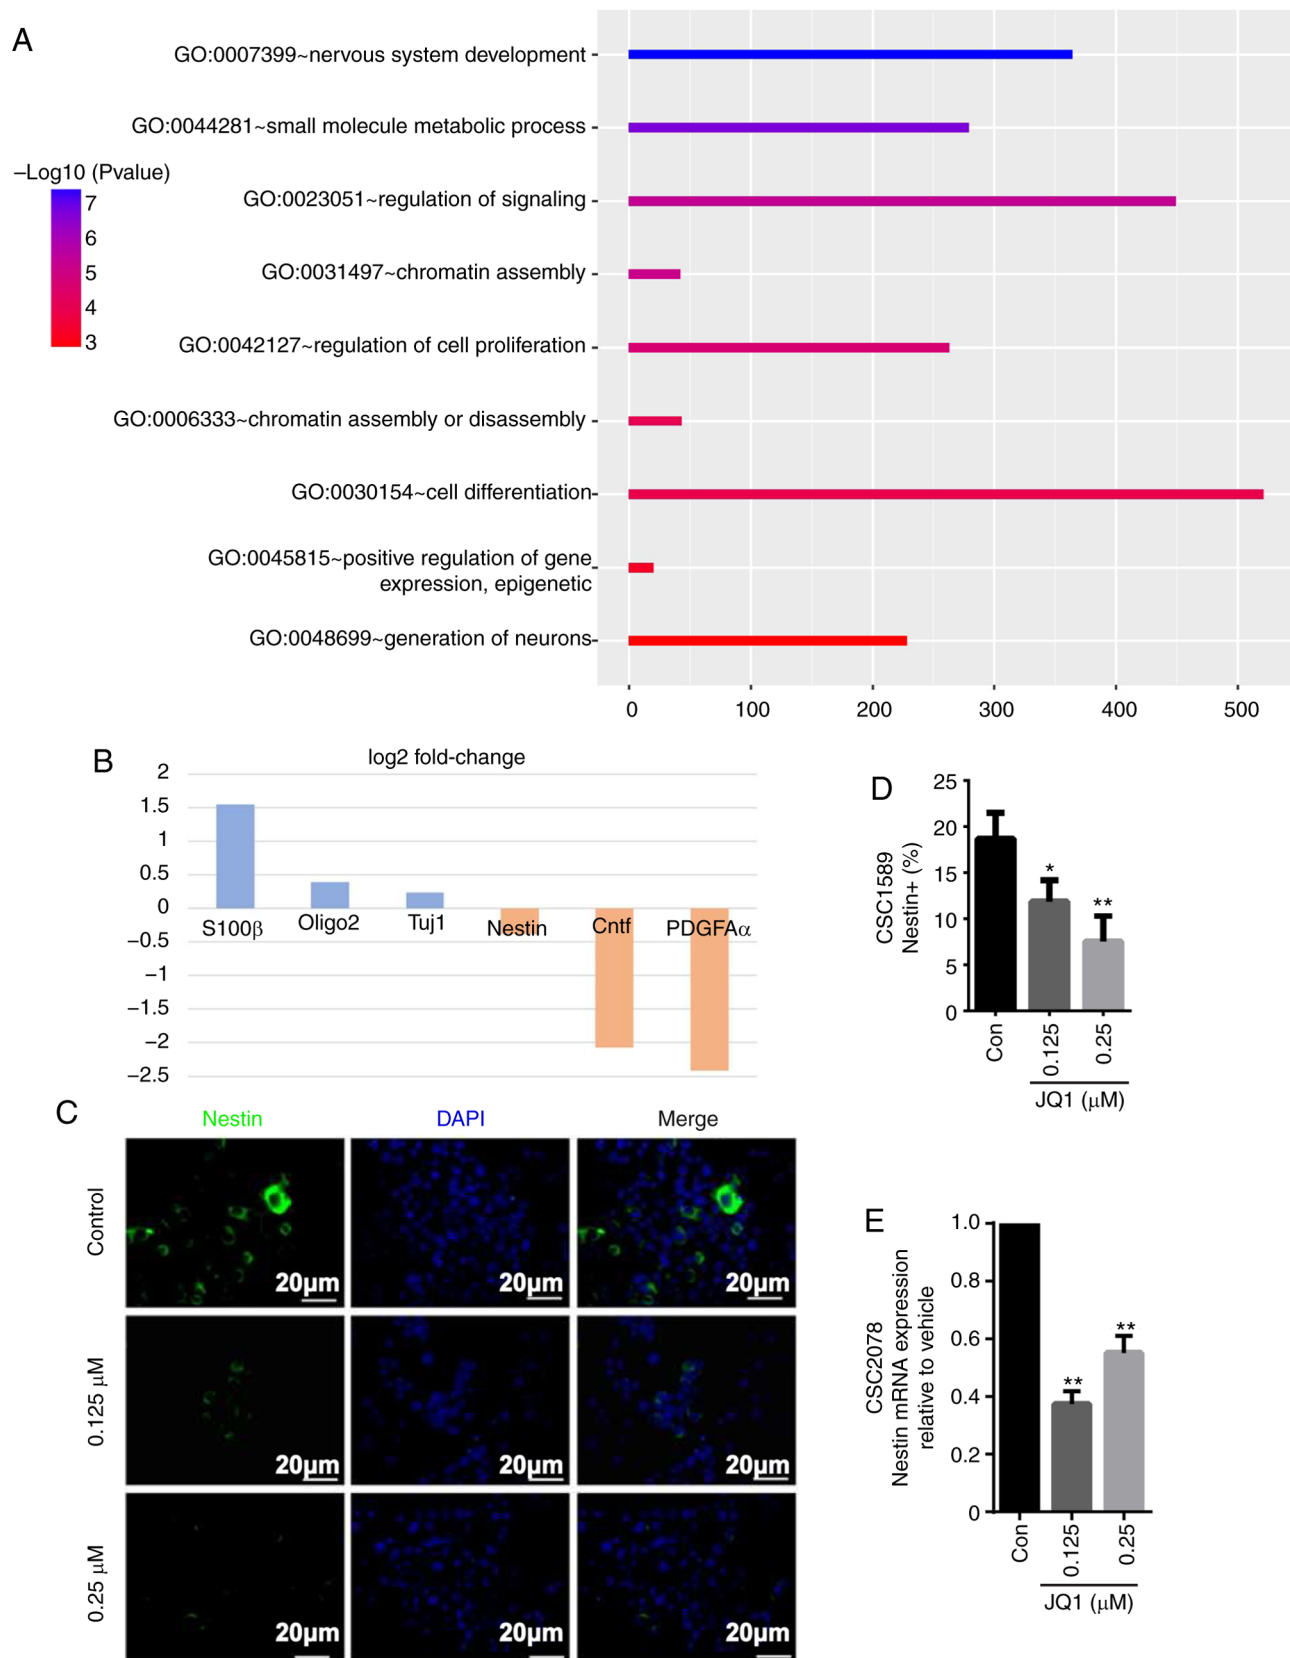

Figure S7. Primary data of CSC2078 apoptosis analysis. (A) JQ1 induced cell apoptosis in CSC2078 in control. (B) Apoptosis of CSC2078 treated with JQ1 (0.05  $\mu$ M). (C) Cell apoptosis of CSC2078 treated by JQ1 (0.1  $\mu$ M). (D) Cell apoptosis of CSC2078 treated by JQ1 (0.2  $\mu$ M).

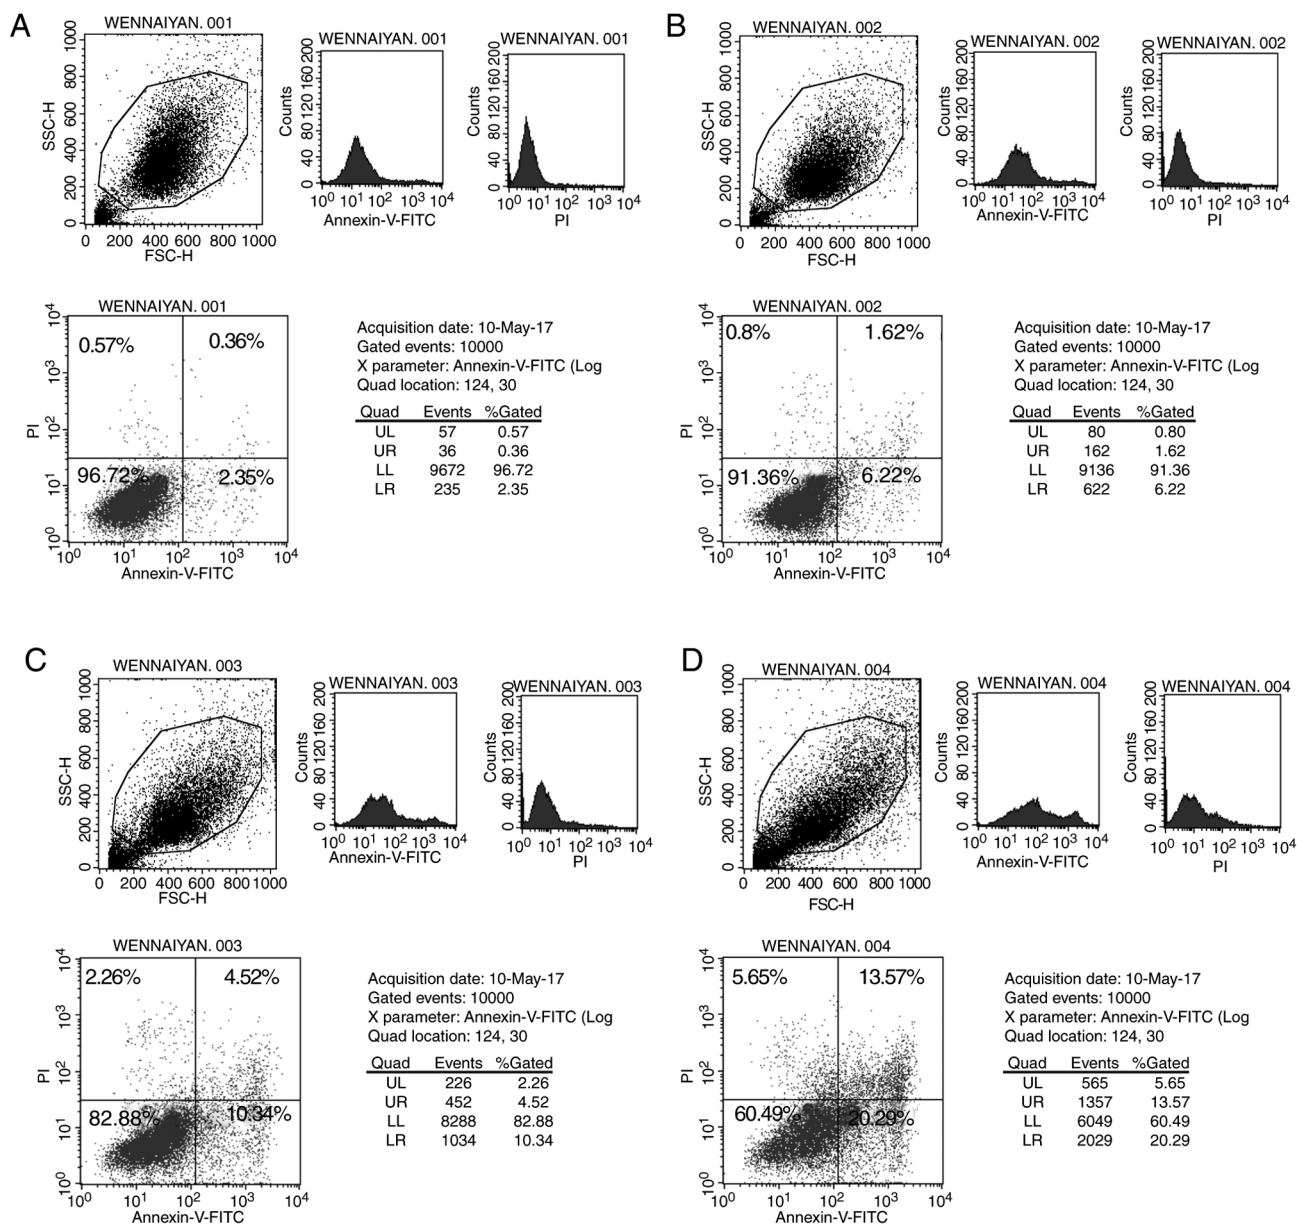



Figure S8. Continued.

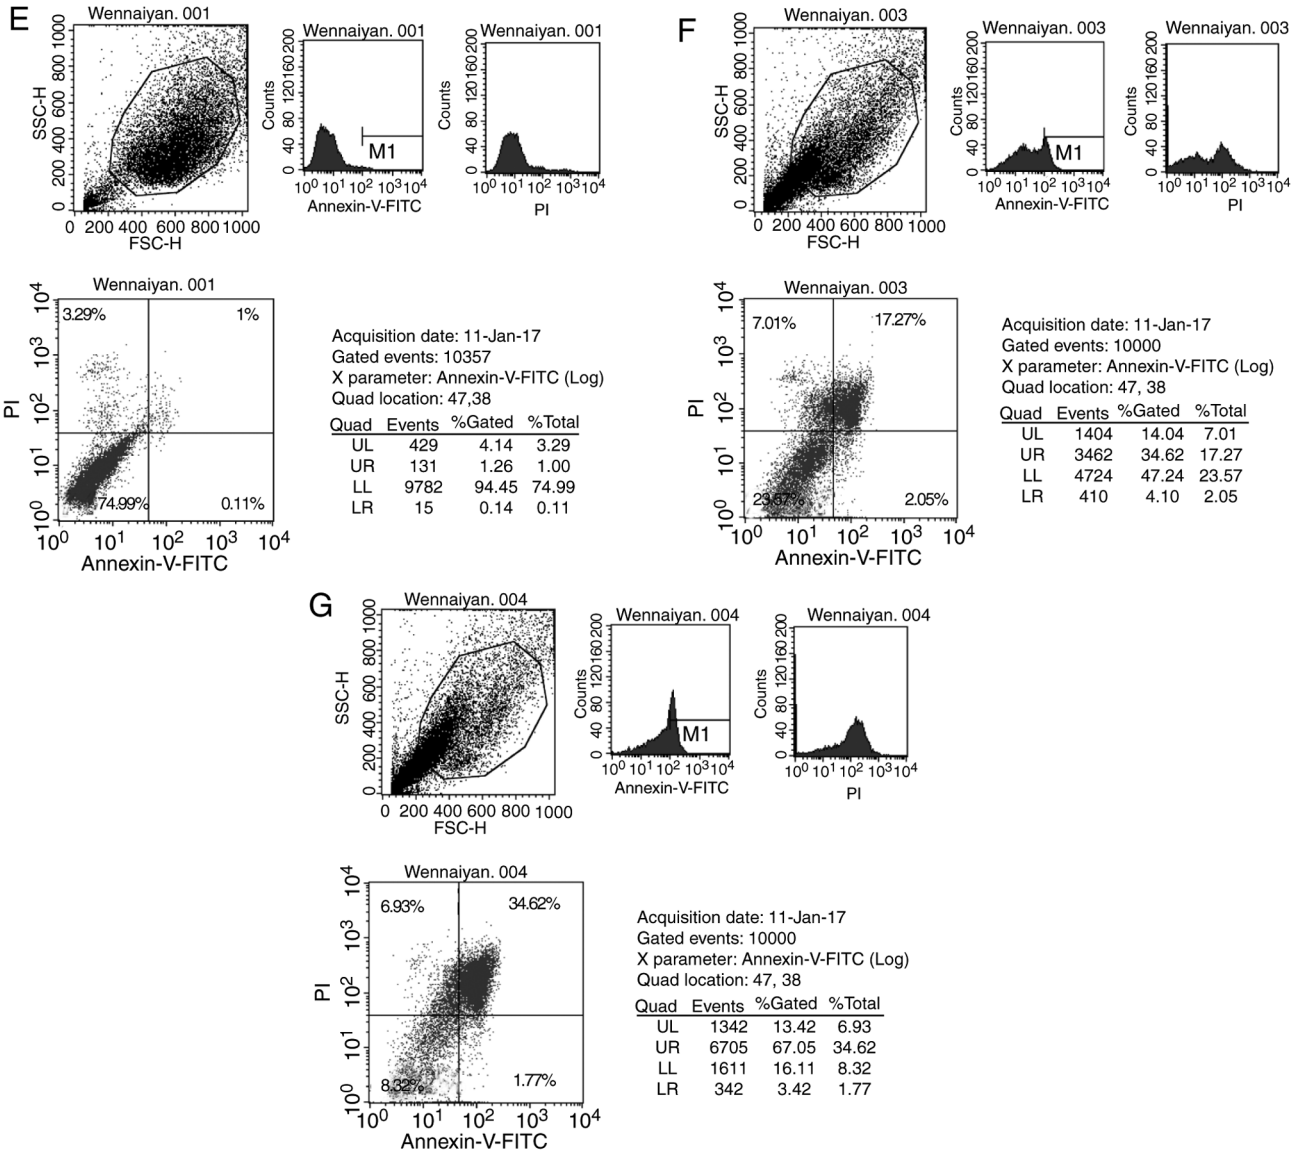

Figure S9. Primary data of CSC2078 apoptosis. (A) Apoptosis of CSC2078 cells in the control. (B) Apoptosis of CSC2078 treated with JQ1. (C) Cell apoptosis of CSC2078 treated by linifanib. (D) Apoptosis of CSC2078 cells treated with linifanib and JQ1.

**A** 6月 25, 2019. 4:33 PM InCyte 3.1  
 Well number: A02 Sample ID: Sample #2  
 File name: F:/wny/2019-06-25\_at\_02-15-52pm.fcs

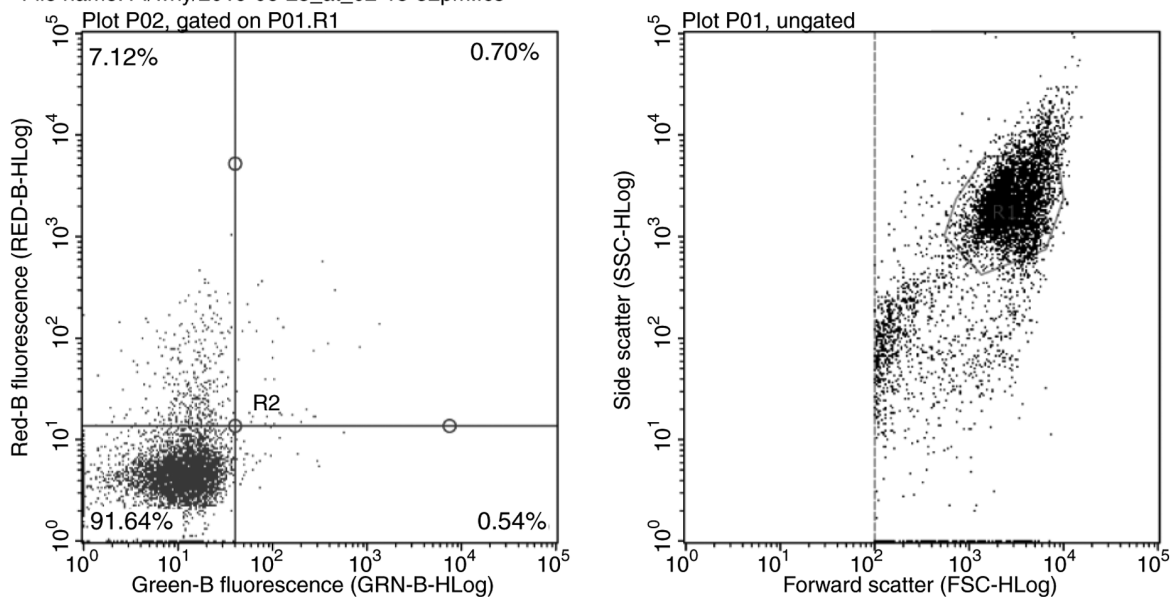

6月 25, 2019. 4:33 PM InCyte 3.1

| Well | Sample ID | Date       | R2.Percent.UL<br>Percent<br>for R2<br>gated by P01.R1<br>(%) | R2.Percent.UR<br>Percent<br>for R2<br>gated by P01.R1<br>(%) | R2.Percent.LL<br>Percent<br>for R2<br>gated by P01.R1<br>(%) | R2.Percent.LR<br>Percent<br>for R2<br>gated by P01.R1<br>(%) |
|------|-----------|------------|--------------------------------------------------------------|--------------------------------------------------------------|--------------------------------------------------------------|--------------------------------------------------------------|
| A02  | Sample #2 | 06.25.2019 | 7.12                                                         | 0.70                                                         | 91.64                                                        | 0.54                                                         |

**B** 6月 25, 2019. 4:33 PM InCyte 3.1  
 Well number: A04 Sample ID:  
 File name: F:/wny/2019-06-25\_at\_02-15-52pm.fcs

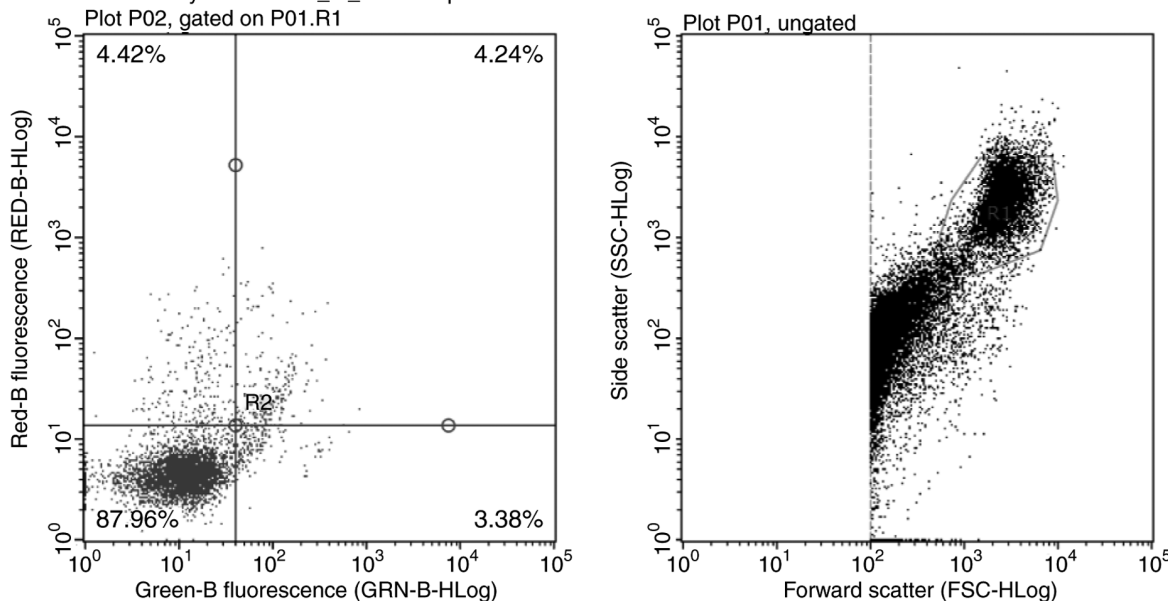

6月 25, 2019. 4:33 PM InCyte 3.1

| Well | Sample ID | Date       | R2.Percent.UL<br>Percent<br>for R2<br>gated by P01.R1<br>(%) | R2.Percent.UR<br>Percent<br>for R2<br>gated by P01.R1<br>(%) | R2.Percent.LL<br>Percent<br>for R2<br>gated by P01.R1<br>(%) | R2.Percent.LR<br>Percent<br>for R2<br>gated by P01.R1<br>(%) |
|------|-----------|------------|--------------------------------------------------------------|--------------------------------------------------------------|--------------------------------------------------------------|--------------------------------------------------------------|
| A04  |           | 06.25.2019 | 4.42                                                         | 4.24                                                         | 87.96                                                        | 3.38                                                         |

Figure S9. Continued.

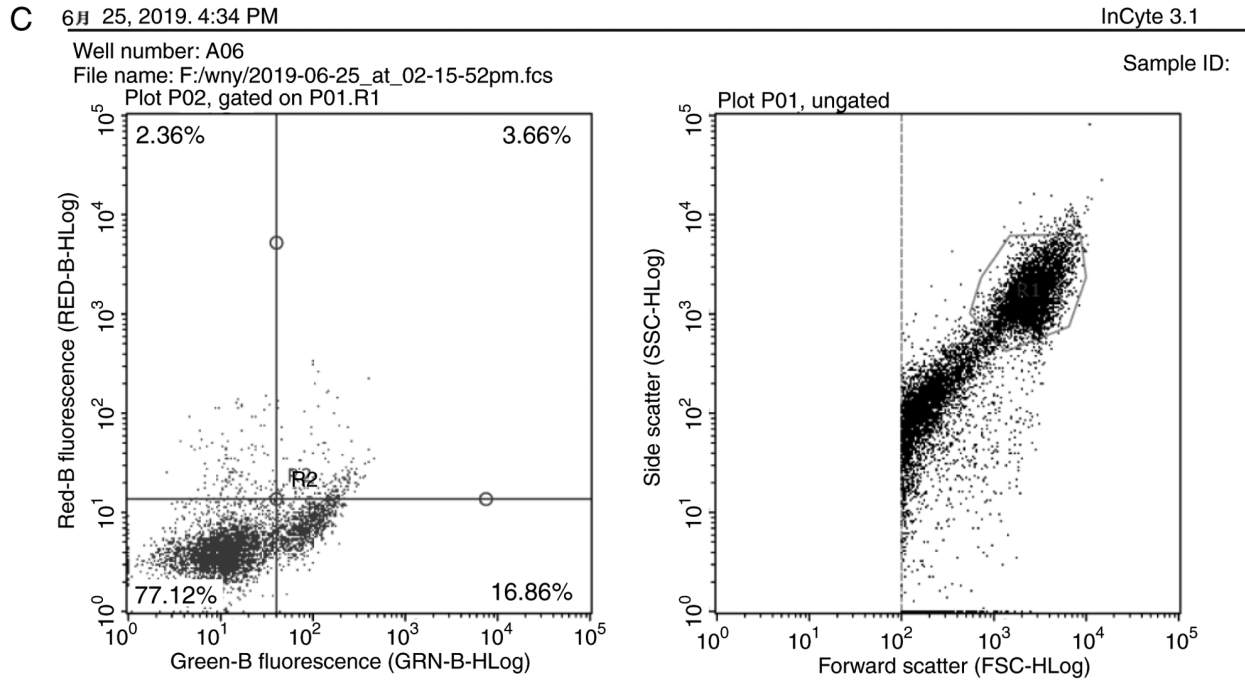

6月 25, 2019. 4:34 PM InCyte 3.1

| Well | Sample ID | Date       | R2.Percent.UL<br>Percent<br>for R2<br>gated by P01.R1<br>(%) | R2.Percent.UR<br>Percent<br>for R2<br>gated by P01.R1<br>(%) | R2.Percent.LL<br>Percent<br>for R2<br>gated by P01.R1<br>(%) | R2.Percent.LR<br>Percent<br>for R2<br>gated by P01.R1<br>(%) |
|------|-----------|------------|--------------------------------------------------------------|--------------------------------------------------------------|--------------------------------------------------------------|--------------------------------------------------------------|
| A06  |           | 06.25.2019 | 2.36                                                         | 3.66                                                         | 77.12                                                        | 16.86                                                        |

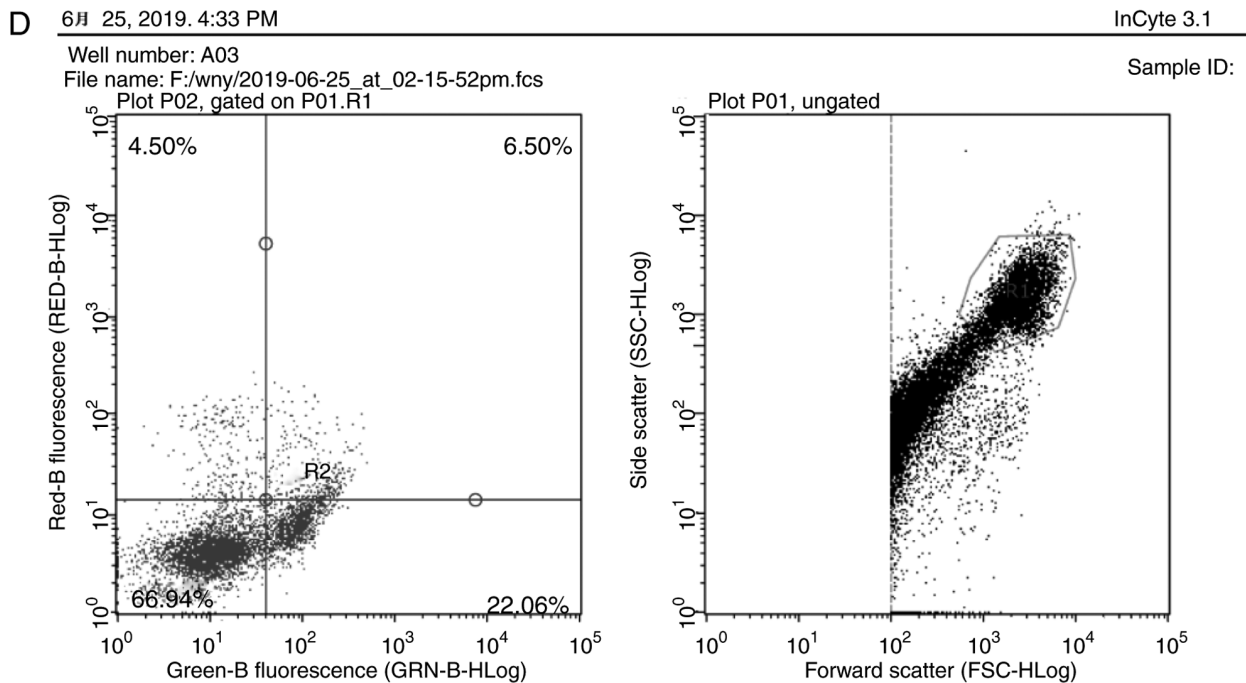

6月 25, 2019. 4:33 PM InCyte 3.1

| Well | Sample ID | Date       | R2.Percent.UL<br>Percent<br>for R2<br>gated by P01.R1<br>(%) | R2.Percent.UR<br>Percent<br>for R2<br>gated by P01.R1<br>(%) | R2.Percent.LL<br>Percent<br>for R2<br>gated by P01.R1<br>(%) | R2.Percent.LR<br>Percent<br>for R2<br>gated by P01.R1<br>(%) |
|------|-----------|------------|--------------------------------------------------------------|--------------------------------------------------------------|--------------------------------------------------------------|--------------------------------------------------------------|
| A03  |           | 06.25.2019 | 4.50                                                         | 6.50                                                         | 66.94                                                        | 22.06                                                        |

Table SI. siRNA sequences.

| siRNA            | Sense (5'-3')         | Antisense (5'-3')     |
|------------------|-----------------------|-----------------------|
| Negative control | UUCUCCGAACGUGUCACGUTT | ACGUGACACGUUCGGAGAATT |
| Brd4-mus-475     | GCUCAAGACACUAUGGAAATT | UUUCCAUAGUGUCUUGAGCTT |
| Brd4-mus-1648    | GCCUGAAGAGCCAGUUGUUTT | AACAACUGGCUCUUCAGGCTT |
| Brd4-mus-3820    | GCCUGAGAUGAAGCCUGUATT | UACAGGCUUCAUCUCAGGCTT |

siRNA, small interfering RNA.

Table SII. Primer sequences (*Mus musculus*).

| Gene      | Forward primer (5'-3') | Reverse primer (5'-3')   |
|-----------|------------------------|--------------------------|
| c-Myc     | ATGCCCCCTCAACGTGAACTTC | GTCGCAGATGAAATAGGGCTG    |
| Cyclin D1 | GCGTACCCTGACACCAATCTC  | ACTTGAAGTAAGATACGGAGGGC  |
| P21       | CGAGAACGGTGGAACCTTG    | CCAGGGCTCAGGTAGACCTT     |
| P27       | TCAAACGTGAGAGTGTCTAACG | CCGGGCCGAAGAGATTTCTG     |
| BIM       | GACAGAACCGCAAGACAGGAG  | GGACTTGGGGTTTGTGTTGAC    |
| BAX       | AGACAGGGGCCTTTTTGCTAC  | AATTCGCCGGAGACACTCG      |
| BAK       | GCCCTGTACGTCTACCAGC    | TGGCGATGTAATGATGCAGTATG  |
| BCL-2     | GAGAGCGTCAACAGGGAGATG  | CCAGCCTCCGTTATCCTGGA     |
| BCL-XL    | ACATCCCAGCTTCACATAACCC | CCATCCC GAAAGAGTTCATTCAC |

BAX, Bcl-2-associated X protein; Bak, Bcl2 antagonist/killer 1; BCL-XL, Bcl-extra large; Bim, Bcl2 like 11.

Table SIII. Primer sequences (*Homo sapiens*).

| Gene     | Forward primer (5'-3') | Reverse primer (5'-3') |
|----------|------------------------|------------------------|
| c-Myc    | TCCCTCCACTCGGAAGGAC    | CTGGTGCATTTTCGGTTGTTG  |
| CyclinD1 | GCTGCGAAGTGGAAACCATC   | CCTCCTTCTGCACACATTTGAA |
| P21      | TGTCCGTCAGAACCCATGC    | AAAGTCGAAGTTCCATCGCTC  |
| P27      | ATGAGCCGCAAACCTGGGTC   | AGAGCCGAACTCCACAATCTC  |
| BIM      | TAAGTTCTGAGTGTGACCGAGA | GCTCTGTCTGTAGGGAGGTAGG |
| BAX      | CCCGAGAGGTCTTTTTCCGAG  | CCAGCCCATGATGGTTCTGAT  |
| BAK      | ATGGTCACCTTACCTCTGCAA  | TCATAGCGTCGGTTGATGTCG  |
| BCL-2    | GGTGGGGTCATGTGTGTGG    | CGGTTCAGGTACTCAGTCATCC |

BAX, Bcl-2-associated X protein; Bak, Bcl2 antagonist/killer 1; BCL-XL, Bcl-extra large; Bim, Bcl2 like 11.
